# Supplementary material for: Antioxidant, α-Amylase and α-Glucosidase Inhibitory Activities and Potential Constituents of Canarium tramdenum Bark
Source: MDPI journal article supplement (doi:10.3390/molecules24030605), 2019-02-09
Supplement: s1 [file s1]

## SUPPLEMENTARY DATA

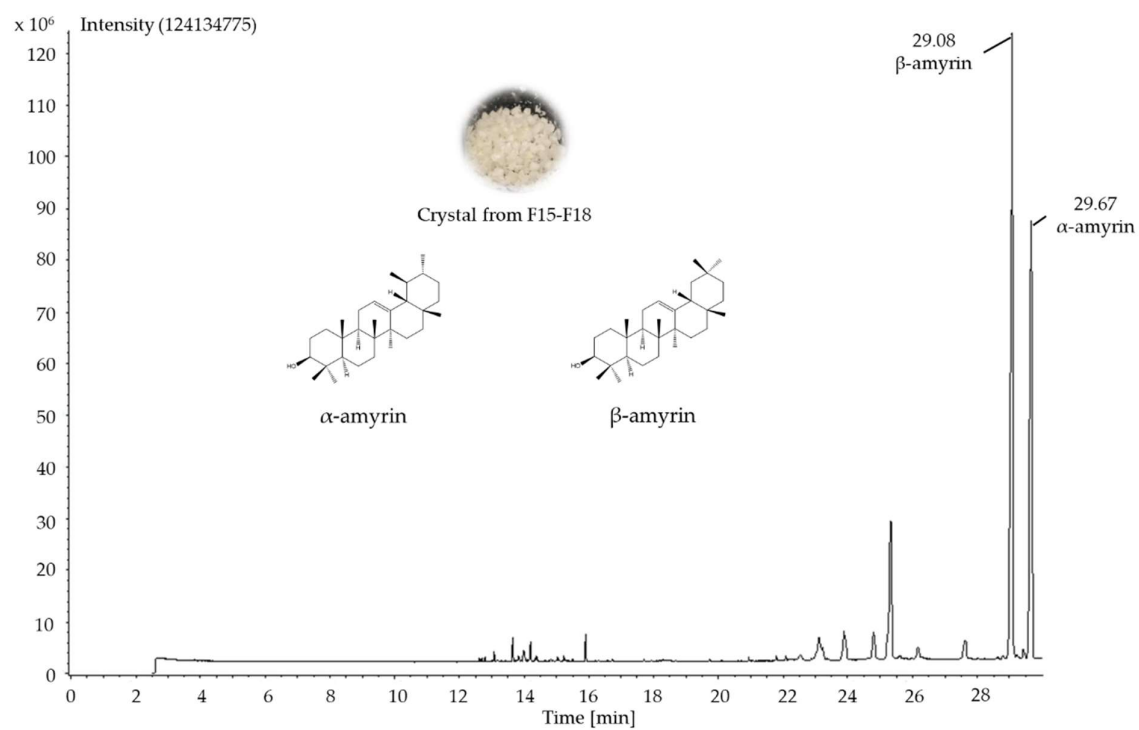

**Figure S1.** GC-MS chromatography of crystal from fractions F15-F18
